# Supplementary material for: Generation of allogeneic and xenogeneic functional muscle stem cells for intramuscular transplantation
Source: JCI journal article supplement (doi:10.1172/jci166998), 2024-05-07
Supplement: sd1 [file 1]

301 Moved Permanently

# Moved Permanently

The document has moved here.
